# Supplementary material
Source: ML conference proceedings conference paper supplement (https://proceedings.neurips.cc/paper_files/paper/2023/hash/84bad835faaf48f24d990072bb5b80ee-Abstract.html)
Supplement: Supplementary file 1 [file 84bad835faaf48f24d990072bb5b80ee-Supplemental-Conference.pdf]

494  
495  
496

## Appendices for Online Ad Procurement in Non-stationary Autobidding Worlds

---

### 497 A Proofs for Section 4

#### 498 A.1 Additional definitions for Section 4

499 **Definition A.1** (Total variation between probability distributions). *Consider two distributions*  
500  $\mathcal{P}, \mathcal{P}' \subseteq \Delta(\mathcal{S})$ . *Then we define their total variation as  $\|\mathcal{P} - \mathcal{P}'\|_{TV} = \frac{1}{2} \int_{\mathcal{S}} |\mathcal{P}(s) - \mathcal{P}'(s)| ds$ .*

501 We also define the smoothed version of  $h_t : \mathcal{X} \rightarrow \mathbb{R}$  (see Eq. (4)) for any  $t$  as followed:

$$\hat{h}_t(\mathbf{x}) = \mathbb{E}_{\mathbf{v} \sim U(\mathbb{B})} [\mathcal{L}_t(\mathbf{x} + \rho \mathbf{v}, \boldsymbol{\lambda}_t)] \quad (10)$$

502 where we recall the Lagrangian function  $\mathcal{L}_t$  is defined in Eq. (3).

#### 503 A.2 Additional lemmas for Section 4

504 **Lemma A.1** (Lipschitz continuity). *Let Assumption 2.1 hold, and recall the definitions  $h_t(\mathbf{x})$  and*  
505  $\hat{h}_t(\mathbf{x})$  *from Eqs. (4) as well as (10), respectively, and recall  $\boldsymbol{\lambda}_1 \dots \boldsymbol{\lambda}_T$  are the dual variables generated*  
506 *from Algorithm 1. Then for any  $\mathbf{x}, \mathbf{x}' \in \mathcal{X}$ , we have  $|h_t(\mathbf{x}) - h_t(\mathbf{x}')| \leq (1 + K \frac{\bar{F}}{\beta}) L \cdot \|\mathbf{x} - \mathbf{x}'\|$  and*  
507  $|h_t(\mathbf{x}) - \hat{h}_t(\mathbf{x})| \leq (1 + K \frac{\bar{F}}{\beta}) L \rho$ .

508 **Lemma A.2** (Bounding BOCO dynamic regret with surrogate loss). *Recall the definition  $\hat{h}_t(\mathbf{x}) =$*   
509  $\mathbb{E}_{\mathbf{v} \sim U(\mathbb{B})} [\mathcal{L}_t(\mathbf{x} + \rho \mathbf{v}, \boldsymbol{\lambda}_t)]$ . *Then,  $\hat{h}_t(\mathbf{x})$  is concave. Further, For any  $\mathbf{y} \in (1 - \alpha)\mathcal{X}$ , we have*  
510  $\hat{h}_t(\mathbf{y}) - \hat{h}_t(\tilde{\mathbf{x}}_t) \leq \mathbb{E}_{\mathbf{u}_t \sim U(\mathbb{S})} [\ell_t(\tilde{\mathbf{x}}_t) - \ell_t(\mathbf{y})]$ , *where  $\tilde{\mathbf{x}}_t$  is defined in Eq. (5), and the surrogate loss*  
511 *function  $\ell_t : \mathcal{X} \rightarrow \mathbb{R}$  is defined in Eq. (7).*

512 **Lemma A.3** (Bounding surrogate loss for each expert). *Recall the definition of individual forecasters*  
513  $\tilde{\mathbf{x}}_t^i$  *defined in Eq. (8), and the surrogate loss function  $\ell_t : \mathcal{X} \rightarrow \mathbb{R}$  defined in Eq. (7). Then*  
514 *for any  $i \in [N]$  and any sequence  $\mathbf{y}_{1:T} \in \mathcal{X}^T$  we have (i)  $\sum_{t \in [T]} \ell_t(\tilde{\mathbf{x}}_t^i) - \ell_t((1 - \alpha)\mathbf{y}_t) \leq$*   
515  $\mathcal{O}\left(\frac{1 + P(\mathbf{y}_{1:T})}{\gamma_i} + \frac{\gamma_i}{\beta^2 \rho^2} T\right)$  *and (ii)  $\sum_{t \in [T]} \ell_t(\tilde{\mathbf{x}}_t) - \ell_t(\tilde{\mathbf{x}}_t^i) \leq \mathcal{O}(T\epsilon + \frac{1}{\epsilon})$ . where the constant  $\beta$  is*  
516 *specified in Algorithm 1. Here, recall  $D$  is the diameter of the decision set  $\mathcal{X}$ .*

517 The proofs of Lemmas A.1, A.2, A.3 are shown in Appendices A.9, A.10, and A.11, respectively.

#### 518 A.3 Proof for Lemma 4.1

519 *Proof.* For any  $k \in [K]$  we have

$$\begin{aligned} \sum_{t \in [T]} g_{k,t}(\mathbf{x}_t) &= \sum_{t \in [\tau_A - 1]} g_{k,t}(\mathbf{x}_t) + \sum_{t = \tau_A}^T g_{k,t}(\mathbf{x}_t) \stackrel{(a)}{\geq} \sum_{t \in [\tau_A - 1]} g_{k,t}(\mathbf{x}_t) + \bar{\beta}(T - \tau_A + 1) \\ &\geq \sum_{t \in [\tau_A - 1]} g_{k,t}(\mathbf{x}_t) + \beta(T - \tau_A) + \beta \stackrel{(b)}{\geq} \bar{G} + \beta > 0 \end{aligned} \quad (11)$$

520 where in (a) we set  $\mathbf{x}_t = \tilde{\mathbf{x}}_\beta$  for all  $t = \tau_A \dots T$  and  $g_{k,t}(\tilde{\mathbf{x}}_\beta) \geq \bar{\beta}$  for any  $k \in [K]$ ; (b) follows from  
521 the definition of the stopping time such that for any  $t' < \tau_A$  and  $k \in [K]$  we have  $\sum_{t \in [t']} g_{k,t}(\mathbf{x}_t) -$   
522  $\bar{G} + \beta(T - t' - 1) \geq 0$ .  $\square$

#### 523 A.4 Proof for Lemma 4.4

524 *Proof.* It is easy to see  $\boldsymbol{\lambda}_{t+1} = \Pi_{[0, \frac{\bar{F}}{\beta} \mathbf{e}]}(\boldsymbol{\lambda}_t - \eta \nabla_{\boldsymbol{\lambda}} \mathcal{L}_t(\mathbf{x}_t, \boldsymbol{\lambda}_t))_+ =$   
525  $\arg \min_{\boldsymbol{\lambda} \in [0, \frac{\bar{F}}{\beta} \mathbf{e}]} \nabla_{\boldsymbol{\lambda}} \mathcal{L}_t(\mathbf{x}_t, \boldsymbol{\lambda}_t)^\top \boldsymbol{\lambda} + \frac{1}{2\eta} \|\boldsymbol{\lambda} - \boldsymbol{\lambda}_t\|^2$ . By the first-order stationary condition

526 at  $\boldsymbol{\lambda}_{t+1}$ , we have for any  $\boldsymbol{\lambda} \in [0, \frac{\bar{F}}{\beta} \mathbf{e}]$

$$\left( \nabla_{\boldsymbol{\lambda}} \mathcal{L}_t(\mathbf{x}_t, \boldsymbol{\lambda}_t) + \frac{1}{\eta} (\boldsymbol{\lambda}_{t+1} - \boldsymbol{\lambda}_t) \right)^\top (\boldsymbol{\lambda} - \boldsymbol{\lambda}_{t+1}) \geq 0$$

527 Then for all  $\boldsymbol{\lambda} \in \mathbb{R}_{\geq 0}^K$ , it follows that

$$\begin{aligned} & \nabla_{\boldsymbol{\lambda}} \mathcal{L}_t(\mathbf{x}_t, \boldsymbol{\lambda}_t)^\top (\boldsymbol{\lambda}_t - \boldsymbol{\lambda}) \\ &= \nabla_{\boldsymbol{\lambda}} \mathcal{L}_t(\mathbf{x}_t, \boldsymbol{\lambda}_t)^\top (\boldsymbol{\lambda}_t - \boldsymbol{\lambda}_{t+1}) + \nabla_{\boldsymbol{\lambda}} \mathcal{L}_t(\mathbf{x}_t, \boldsymbol{\lambda}_t)^\top (\boldsymbol{\lambda}_{t+1} - \boldsymbol{\lambda}) \\ &\leq \nabla_{\boldsymbol{\lambda}} \mathcal{L}_t(\mathbf{x}_t, \boldsymbol{\lambda}_t)^\top (\boldsymbol{\lambda}_t - \boldsymbol{\lambda}_{t+1}) + \frac{1}{\eta} (\boldsymbol{\lambda}_{t+1} - \boldsymbol{\lambda}_t)^\top (\boldsymbol{\lambda} - \boldsymbol{\lambda}_{t+1}) \\ &\leq \nabla_{\boldsymbol{\lambda}} \mathcal{L}_t(\mathbf{x}_t, \boldsymbol{\lambda}_t)^\top (\boldsymbol{\lambda}_t - \boldsymbol{\lambda}_{t+1}) + \frac{1}{2\eta} \|\boldsymbol{\lambda} - \boldsymbol{\lambda}_t\|^2 - \frac{1}{2\eta} \|\boldsymbol{\lambda} - \boldsymbol{\lambda}_{t+1}\|^2 - \frac{1}{2\eta} \|\boldsymbol{\lambda}_{t+1} - \boldsymbol{\lambda}_t\|^2 \\ &\leq \frac{\eta}{2} \|\nabla_{\boldsymbol{\lambda}} \mathcal{L}_t(\mathbf{x}_t, \boldsymbol{\lambda}_t)\|^2 + \frac{1}{2\eta} \|\boldsymbol{\lambda} - \boldsymbol{\lambda}_t\|^2 - \frac{1}{2\eta} \|\boldsymbol{\lambda} - \boldsymbol{\lambda}_{t+1}\|^2 \end{aligned}$$

528 By a telescoping argument, we have

$$\begin{aligned} \sum_{\tau \in [t]} \nabla_{\boldsymbol{\lambda}} \mathcal{L}_\tau(\mathbf{x}_\tau, \boldsymbol{\lambda}_\tau)^\top (\boldsymbol{\lambda}_\tau - \boldsymbol{\lambda}) &\leq \frac{\eta}{2} \sum_{\tau \in [t]} \|\nabla_{\boldsymbol{\lambda}} \mathcal{L}_\tau(\mathbf{x}_\tau, \boldsymbol{\lambda}_\tau)\|^2 + \frac{1}{2\eta} \|\boldsymbol{\lambda} - \boldsymbol{\lambda}_1\|^2 \\ &= \frac{\eta}{2} \sum_{\tau \in [t]} \|\nabla_{\boldsymbol{\lambda}} \mathcal{L}_\tau(\mathbf{x}_\tau, \boldsymbol{\lambda}_\tau)\|^2 + \frac{1}{2\eta} \|\boldsymbol{\lambda}\|^2. \end{aligned} \quad (12)$$

529 where in the final equality we used  $\boldsymbol{\lambda}_1 = \mathbf{0}$ . Also,

$$\|\nabla_{\boldsymbol{\lambda}} \mathcal{L}_\tau(\mathbf{x}_\tau, \boldsymbol{\lambda}_\tau)\|^2 = \|\mathbf{g}_\tau(\mathbf{x}_\tau)\|^2 \leq K \bar{G}^2 \quad (13)$$

530 Hence, combining Eqs. (12) and (13), we get the desired bound.  $\square$

### 531 A.5 Proof of Lemma 4.5

532 *Proof.* If  $\tau_A = T$ , taking  $\boldsymbol{\lambda} = \mathbf{0}$  in Lemma 4.4 yields  $\sum_{t \in [T]} \boldsymbol{\lambda}_t^\top \mathbf{g}_t(\mathbf{x}_t) \leq \frac{\eta}{2} TK \bar{G}^2$  and thus the  
533 desired inequality holds. If  $\tau_A < T$ , then there exists some  $k \in [K]$  such that  $\sum_{t \in [\tau_A]} g_{k,t}(\mathbf{x}_t) -$   
534  $\bar{G} + \beta(T - \tau_A - 1) < 0$ , so by taking  $\boldsymbol{\lambda} = \frac{\bar{F}}{\beta} \mathbf{e}_k$  ( $\mathbf{e}_k \in \mathbb{R}^K$  is the unit vector whose  $k$ th entry is 1)  
535 in Lemma 4.4 yields

$$\begin{aligned} & \sum_{t \in [\tau_A]} \boldsymbol{\lambda}_t^\top \mathbf{g}_t(\mathbf{x}_t) \\ &\leq \sum_{t \in [\tau_A]} \boldsymbol{\lambda}^\top \mathbf{g}_t(\mathbf{x}_t) + \frac{\eta}{2} TK \bar{G}^2 + \frac{1}{2\eta} \|\boldsymbol{\lambda}\|^2 \\ &= \frac{\bar{F}}{\beta} \sum_{t \in [\tau_A]} g_{k,t}(\mathbf{x}_t) + \frac{\eta}{2} TK \bar{G}^2 + \frac{1}{2\eta} \left( \frac{\bar{F}}{\beta} \right)^2 \\ &\leq -\frac{\bar{F}}{\beta} \cdot \beta(T - \tau_A - 1) + \frac{\bar{F}}{\beta} \bar{G} + \frac{\eta}{2} TK \bar{G}^2 + \frac{1}{2\eta} \left( \frac{\bar{F}}{\beta} \right)^2 \\ &= -\bar{F}(T - \tau_A) + \bar{F} + \frac{\bar{F}}{\beta} \bar{G} + \frac{\eta}{2} TK \bar{G}^2 + \frac{1}{2\eta} \left( \frac{\bar{F}}{\beta} \right)^2 \end{aligned}$$

536 Summing with  $\bar{F}(T - \tau_A)$  yields the desired result.  $\square$

### 537 A.6 Proof of Lemma 4.6

538 *Proof.* Recall the definition of  $\hat{h}_t(\mathbf{x})$  in Eq. (4). Then, we have

$$\begin{aligned} & \sum_{\tau \in [t]} h_\tau(\mathbf{y}_\tau) - \sum_{\tau \in [t]} h_\tau(\mathbf{x}_\tau) \\ &= \sum_{\tau \in [t]} \left( \underbrace{h_\tau(\mathbf{y}_\tau) - \hat{h}_\tau((1 - \alpha)\mathbf{y}_\tau)}_A + \underbrace{\hat{h}_\tau((1 - \alpha)\mathbf{y}_\tau) - \hat{h}_\tau(\tilde{\mathbf{x}}_\tau)}_B + \underbrace{\hat{h}_\tau(\tilde{\mathbf{x}}_\tau) - h_\tau(\mathbf{x}_\tau)}_C \right) \end{aligned} \quad (14)$$

539 **Bounding A.**

$$\begin{aligned}
h_\tau(\mathbf{y}_\tau) - \hat{h}_\tau((1-\alpha)\mathbf{y}_\tau) &= h_\tau(\mathbf{y}_\tau) - h_\tau((1-\alpha)\mathbf{y}_\tau) + h_\tau((1-\alpha)\mathbf{y}_\tau) - \hat{h}_\tau((1-\alpha)\mathbf{y}_\tau) \\
&\stackrel{(a)}{\leq} (1 + K\frac{\bar{F}}{\beta})L\alpha\|\mathbf{y}_\tau\| + (1 + K\frac{\bar{F}}{\beta})L\rho \\
&\stackrel{(b)}{\leq} (1 + K\frac{\bar{F}}{\beta})L\alpha D + (1 + K\frac{\bar{F}}{\beta})L\rho
\end{aligned} \tag{15}$$

540 where (a) follows from Lemma A.1; (b) follows from  $\|\mathbf{y}_\tau\| = \|\mathbf{y}_\tau - \mathbf{0}\| \leq D$  since we assumed  
541  $\mathbf{0} \in \mathcal{X}$ .

542 **Bounding B.**

$$\begin{aligned}
&\sum_{t \in [T]} \hat{h}_\tau((1-\alpha)\mathbf{y}_\tau) - \hat{h}_\tau(\tilde{\mathbf{x}}_\tau) \\
&\stackrel{(a)}{\leq} \sum_{t \in [T]} \mathbb{E}_{\mathbf{u}_\tau \sim U(\mathbb{S})} [\ell_\tau(\tilde{\mathbf{x}}_\tau) - \ell_\tau((1-\alpha)\mathbf{y}_\tau)] \\
&= \sum_{t \in [T]} \mathbb{E}_{\mathbf{u}_\tau \sim U(\mathbb{S})} [\ell_\tau(\tilde{\mathbf{x}}_\tau) - \ell_\tau(\tilde{\mathbf{x}}_\tau^i) + \ell_\tau(\tilde{\mathbf{x}}_\tau^i) - \ell_\tau((1-\alpha)\mathbf{y}_\tau)] \\
&\stackrel{(b)}{\leq} \mathcal{O}\left(\frac{P(\mathbf{y}_{1:T})}{\gamma_i} + \frac{\gamma_i K \frac{\bar{F}}{\beta} T}{\rho^2} + T\epsilon + \frac{1}{\epsilon}\right)
\end{aligned} \tag{16}$$

543 where (a) follows from Lemma A.2 and (b) follows from Lemma A.3 (i) and (ii).

544 **Bounding C.**

$$\begin{aligned}
\hat{h}_\tau(\tilde{\mathbf{x}}_\tau) - h_\tau(\mathbf{x}_\tau) &= \hat{h}_\tau(\tilde{\mathbf{x}}_\tau) - h_\tau(\tilde{\mathbf{x}}_\tau) + h_\tau(\tilde{\mathbf{x}}_\tau) - h_\tau(\mathbf{x}_\tau) \\
&\stackrel{(a)}{\leq} (1 + K\frac{\bar{F}}{\beta})L\rho + (1 + K\frac{\bar{F}}{\beta})L \cdot \|\tilde{\mathbf{x}}_\tau - \mathbf{x}_\tau\| \\
&\stackrel{(b)}{=} (1 + K\frac{\bar{F}}{\beta})L\rho + (1 + K\frac{\bar{F}}{\beta})L \cdot \|\rho\mathbf{u}_\tau\| \\
&\leq 2\rho(1 + K\frac{\bar{F}}{\beta})L
\end{aligned} \tag{17}$$

545 where (a) follows from Lemma A.1; (b) follows from the definition  $\mathbf{x}_\tau = \tilde{\mathbf{x}}_\tau + \rho\mathbf{u}_\tau$  in Algorithm  
546 1.  $\square$

## 547 A.7 Proof of Lemma 4.3

548 **Stochastic.**

549 *Proof.* In the stochastic regime, we have  $\mathcal{P} = \mathcal{P}_1 = \dots = \mathcal{P}_T$  for some  $\mathcal{P}$ , and therefore we can  
550 rewrite  $\text{OPT}(\mathcal{P}_{1:T})$  in Eq. (1) as followed

$$\text{OPT}(\mathcal{P}_{1:T}) = \max_{\mathbf{x}_{1:T} \in \mathcal{X}^T} \sum_{t \in [T]} F(\mathbf{x}_t) \quad \text{s.t.} \quad \sum_{t \in [T]} \mathbf{G}(\mathbf{x}_t) \geq \mathbf{0}.$$

551 where we defined  $F(\mathbf{x}) = \mathbb{E}_{(f,g) \sim \mathcal{P}}[f(\mathbf{x})]$ , and  $\mathbf{G}(\mathbf{x}) = \mathbb{E}_{(f,g) \sim \mathcal{P}}[\mathbf{g}(\mathbf{x})]$  for any  $\mathbf{x} \in \mathcal{X}$ . Hence, for  
552 any  $\boldsymbol{\lambda} \geq \mathbf{0}$  we have

$$\begin{aligned}
\text{OPT}(\mathcal{P}_{1:T}) &= \frac{T - \tau_A}{T} \text{OPT}(\mathcal{P}_{1:T}) + \frac{\tau_A}{T} \text{OPT}(\mathcal{P}_{1:T}) \\
&\leq (T - \tau_A)\bar{F} + \frac{\tau_A}{T} \max_{\mathbf{x}_{1:T} \in \mathcal{X}^T} \sum_{t \in [T]} (F(\mathbf{x}_t) + \boldsymbol{\lambda}^\top \mathbf{G}(\mathbf{x}_t)) \\
&= (T - \tau_A)\bar{F} + \frac{\tau_A}{T} \max_{\mathbf{x} \in \mathcal{X}} \sum_{t \in [T]} (F(\mathbf{x}) + \boldsymbol{\lambda}^\top \mathbf{G}(\mathbf{x})) \\
&= (T - \tau_A)\bar{F} + \tau_A \max_{\mathbf{x} \in \mathcal{X}} (F(\mathbf{x}) + \boldsymbol{\lambda}^\top \mathbf{G}(\mathbf{x}))
\end{aligned} \tag{18}$$

553 where in the inequality we applied Assumption 2.1 which states  $\max_{\mathbf{x} \in \mathcal{X}} f(\mathbf{x})$  for all  $(f, \mathbf{g}) \in \mathcal{S}$ .  
 554 Choosing  $\boldsymbol{\lambda} = \boldsymbol{\lambda}_{\tau_A} := \frac{1}{\tau_A} \sum_{t \in [\tau_A]} \boldsymbol{\lambda}_t$  we have

$$\begin{aligned}
 \text{OPT}(\mathcal{P}_{1:T}) &\leq \mathbb{E} \left[ (T - \tau_A) \bar{F} + \tau_A \max_{\mathbf{x} \in \mathcal{X}} (F(\mathbf{x}) + \boldsymbol{\lambda}^\top \mathbf{G}(\mathbf{x})) \right] \\
 &\leq \mathbb{E} \left[ (T - \tau_A) \bar{F} + \max_{\mathbf{x} \in \mathcal{X}} \sum_{t \in [\tau_A]} (F(\mathbf{x}) + \boldsymbol{\lambda}_t^\top \mathbf{G}(\mathbf{x})) \right] \\
 &\stackrel{(a)}{\leq} \mathbb{E} \left[ (T - \tau_A) \bar{F} + \max_{\mathbf{x} \in \mathcal{X}} \sum_{t \in [\tau_A]} \mathbb{E} \left[ f_t(\mathbf{x}) + \boldsymbol{\lambda}_t^\top \mathbf{g}_t(\mathbf{x}) \mid \sigma(\mathcal{H}_{t-1}) \right] \right] \quad (19) \\
 &\stackrel{(b)}{=} \mathbb{E} \left[ (T - \tau_A) \bar{F} + \max_{\mathbf{x} \in \mathcal{X}} \sum_{t \in [\tau_A]} \mathbb{E} \left[ h_t(\mathbf{x}) \mid \sigma(\mathcal{H}_{t-1}) \right] \right] \\
 &\leq \mathbb{E} \left[ (T - \tau_A) \bar{F} + \max_{\mathbf{x} \in \mathcal{X}} \sum_{t \in [\tau_A]} h_t(\mathbf{x}) \right]
 \end{aligned}$$

555 where in (a) we used the fact that  $\boldsymbol{\lambda}_t$  is  $\mathcal{H}_{t-1}$ -measurable; in (b) we used definitions  $h_t(\mathbf{x}) =$   
 556  $\mathcal{L}_t(\mathbf{x}; \boldsymbol{\lambda}_t)$  and  $\mathcal{L}_t(\mathbf{x}; \boldsymbol{\lambda}) = f_t(\mathbf{x}) + \boldsymbol{\lambda}^\top \mathbf{g}_t(\mathbf{x})$  in Eqs. (3) and (4) respectively.

557 On the other hand, we have

$$f_t(\mathbf{x}_t) = h_t(\mathbf{x}_t) - \boldsymbol{\lambda}_t^\top \mathbf{g}_t(\mathbf{x}_t), \quad (20)$$

558 so combining this with Eq. (19) we have

$$\text{OPT}(\mathcal{P}_{1:T}) - \sum_{t \in [T]} \mathbb{E}[f_t(\mathbf{x}_t)] \leq \mathbb{E} \left[ (T - \tau_A) \bar{F} + \max_{\mathbf{x} \in \mathcal{X}} \sum_{t \in [\tau_A]} (h_t(\mathbf{x}) - h_t(\mathbf{x}_t)) + \sum_{t \in \tau_A} \boldsymbol{\lambda}_t^\top \mathbf{g}_t(\mathbf{x}_t) \right] \quad (21)$$

559 where we also used the fact that  $f_t(\mathbf{x}) \geq 0$  for all  $t = \tau_A + 1 \dots T$  and  $\mathbf{x} \in \mathcal{X}$ .  $\square$

## 560 Adversarial.

561 *Proof.* Recall the definition of  $\xi$  is Theorem 4.2:

$$\xi = 1 - \frac{\min_{(f, \mathbf{g}) \in \mathcal{S}} \min_{k \in [K], \mathbf{x} \in \mathcal{X}} g_k(\mathbf{x})}{\bar{\beta}} > 1 \quad (22)$$

562 For any  $t \in [T]$ , define  $\tilde{\mathbf{y}}_t = \arg \max_{\mathbf{x}} f_t(\mathbf{x}) + \boldsymbol{\lambda}_t^\top \mathbf{g}_t(\mathbf{x})$ .

563 By comparing to the safety action  $\mathbf{x}_\beta \in \mathcal{X}$  which ensures  $g_k(\mathbf{x}_\beta) \geq \bar{\beta}$  for any  $k \in [K]$  and  
 564  $(f, \mathbf{g}) \in \mathcal{S}$ , as well as the optimal hindsight action  $\mathbf{x}_t^* \in \mathcal{X}$  (i.e.  $\mathbf{x}_1^* \dots \mathbf{x}_T^*$  is the optimal decision  
 565 sequence to  $\text{OPT}(\mathcal{P}_{1:T})$ ), we have

$$\begin{aligned}
 f_t(\tilde{\mathbf{y}}_t) + \boldsymbol{\lambda}_t^\top \mathbf{g}_t(\tilde{\mathbf{y}}_t) &\geq f_t(\mathbf{x}_\beta) + \boldsymbol{\lambda}_t^\top \mathbf{g}_t(\mathbf{x}_\beta) \geq \bar{\beta} \boldsymbol{\lambda}_t^\top \mathbf{e} \\
 f_t(\tilde{\mathbf{y}}_t) + \boldsymbol{\lambda}_t^\top \mathbf{g}_t(\tilde{\mathbf{y}}_t) &\geq f_t(\mathbf{x}_t^*) + \boldsymbol{\lambda}_t^\top \mathbf{g}_t(\mathbf{x}_t^*).
 \end{aligned} \quad (23)$$

566 We further have

$$\begin{aligned}
 \xi f_t(\tilde{\mathbf{y}}_t) &= f_t(\tilde{\mathbf{y}}_t) + (\xi - 1) f_t(\tilde{\mathbf{y}}_t) \\
 &\stackrel{(a)}{\geq} f_t(\mathbf{x}_t^*) + \boldsymbol{\lambda}_t^\top \mathbf{g}_t(\mathbf{x}_t^*) - \boldsymbol{\lambda}_t^\top \mathbf{g}_t(\tilde{\mathbf{y}}_t) + (\xi - 1) (-\boldsymbol{\lambda}_t^\top \mathbf{g}_t(\tilde{\mathbf{y}}_t) + \bar{\beta} \boldsymbol{\lambda}_t^\top \mathbf{e}) \\
 &= f_t(\mathbf{x}_t^*) + \boldsymbol{\lambda}_t^\top \mathbf{g}_t(\mathbf{x}_t^*) - \xi \boldsymbol{\lambda}_t^\top \mathbf{g}_t(\tilde{\mathbf{y}}_t) + (\xi - 1) \bar{\beta} \boldsymbol{\lambda}_t^\top \mathbf{e} \\
 &\stackrel{(b)}{\geq} f_t(\mathbf{x}_t^*) - \xi \boldsymbol{\lambda}_t^\top \mathbf{g}_t(\tilde{\mathbf{y}}_t)
 \end{aligned} \quad (24)$$

567 where (a) follows Eq.(23); in (b) we used the fact that  $g_{k,t}(\mathbf{x}_t^*) + (\xi - 1)\bar{\beta} \geq 0$  since we have  
 568  $\min_{(f,g) \in \mathcal{S}} \min_{k \in [K], \mathbf{x} \in \mathcal{X}} (g_{k,t}(\mathbf{x}) + (\xi - 1)\bar{\beta}) \geq 0$  (see Eq. (22)). Hence we have

$$\begin{aligned}
 & \text{OPT}(\mathcal{P}_{1:T}) - \sum_{t \in [T]} \mathbb{E}[f_t(\mathbf{x}_t)] \\
 &= \left(1 - \frac{1}{\xi}\right) \text{OPT}(\mathcal{P}_{1:T}) + \sum_{t \in [T]} \mathbb{E}\left[\frac{1}{\xi} f_t(\mathbf{x}_t^*) - f_t(\mathbf{x}_t)\right] \\
 &\leq \left(1 - \frac{1}{\xi}\right) \text{OPT}(\mathcal{P}_{1:T}) + \sum_{t \in [T]} \mathbb{E}\left[f_t(\tilde{\mathbf{y}}_t) - f_t(\mathbf{x}_t) + \boldsymbol{\lambda}_t^\top \mathbf{g}_t(\tilde{\mathbf{y}}_t)\right] \\
 &\leq \left(1 - \frac{1}{\xi}\right) \text{OPT}(\mathcal{P}_{1:T}) + \mathbb{E}\left[(T - \tau_A)\bar{F} + \sum_{t \in \tau_A} \left(f_t(\tilde{\mathbf{y}}_t) - f_t(\mathbf{x}_t) + \boldsymbol{\lambda}_t^\top \mathbf{g}_t(\tilde{\mathbf{y}}_t)\right)\right]
 \end{aligned} \tag{25}$$

569

□

570  **$\delta$ -corrupted.**

571 Here, we will prove a more general  $\delta$ -corrupted model where the input distribution sequence  $\mathcal{P}_{1:T}$   
 572 satisfies the following:

$$\sum_{t \in [T]} \|\mathcal{P}_t - \frac{1}{T} \sum_{s \in [T]} \mathcal{P}_s\|_{TV} \leq \delta \tag{26}$$

573 where the total variation norm is defined in Definition A.1. In fact, the definition in Section 2.2 for  
 574 the  $\delta$ -corrupted regime satisfies the above property: recall in the definition of Section 2.2, there exists  
 575  $\mathcal{P} \in \Delta(\mathcal{S})$  as well as  $\delta \in \mathbb{N}$  periods  $\mathcal{T} = \{\tau_1 \dots \tau_\delta\} \subset [T]$  such that  $\mathcal{P}_t = \mathcal{P}$  for all  $t \notin \mathcal{T}$ , hence  
 576 for any  $t \notin \mathcal{T}$ , we have

$$\begin{aligned}
 \|\mathcal{P}_t - \frac{1}{T} \sum_{s \in [T]} \mathcal{P}_s\|_{TV} &= \|\mathcal{P} - \frac{1}{T} \left(T\mathcal{P} + \sum_{s \in \mathcal{T}} (\mathcal{P} - \mathcal{P}_s)\right)\|_{TV} \\
 &= \|\frac{1}{T} \sum_{s \in \mathcal{T}} (\mathcal{P} - \mathcal{P}_s)\|_{TV} \\
 &\leq \frac{\delta}{2T}
 \end{aligned} \tag{27}$$

577 On the other hand, we have for any  $\tau \in \mathcal{T}$ ,  $\|\mathcal{P}_\tau - \frac{1}{T} \sum_{s \in [T]} \mathcal{P}_s\|_{TV} \leq \frac{1}{2}$ . Hence, summing up we  
 578 get

$$\begin{aligned}
 \sum_{t \in [T]} \|\mathcal{P}_t - \frac{1}{T} \sum_{s \in [T]} \mathcal{P}_s\|_{TV} &= \sum_{t \in \mathcal{T}} \|\mathcal{P}_t - \frac{1}{T} \sum_{s \in [T]} \mathcal{P}_s\|_{TV} + \sum_{t \notin \mathcal{T}} \|\mathcal{P}_t - \frac{1}{T} \sum_{s \in [T]} \mathcal{P}_s\|_{TV} \\
 &\leq \frac{\delta}{2} + (T - \delta) \frac{\delta}{2T} \leq \delta
 \end{aligned}$$

579 which coincides with our general definition of  $\delta$ -corruption in Eq. (26).

580 We now prove the  $\delta$ -corruption regime under the general definition in Eq. (26). Define  $\tilde{\mathcal{P}} =$   
 581  $\frac{1}{T} \sum_{s \in [T]} \mathcal{P}_s$ ,  $\tilde{F}(\mathbf{x}) = \mathbb{E}_{(f,g) \sim \tilde{\mathcal{P}}}[f(\mathbf{x})]$ ,  $\tilde{\mathbf{G}}(\mathbf{x}) = \mathbb{E}_{(f,g) \sim \tilde{\mathcal{P}}}[\mathbf{g}(\mathbf{x})]$ ,  $F_t(\mathbf{x}) = \mathbb{E}_{(f,g) \sim \mathcal{P}_t}[f(\mathbf{x})]$  and  
 582  $\mathbf{G}_t(\mathbf{x}) = \mathbb{E}_{(f,g) \sim \mathcal{P}_t}[\mathbf{g}(\mathbf{x})]$  for all  $t \in [T]$  and any  $\mathbf{x} \in \mathcal{X}$ . Then for any  $\boldsymbol{\lambda} \in [\mathbf{0}, \frac{\bar{F}}{\beta} \mathbf{e}]$ , we have

$$\begin{aligned}
 \text{OPT}(\mathcal{P}_{1:T}) &\leq \max_{\mathbf{x}_{1:T} \in \mathcal{X}^T} \sum_{t \in [T]} (F_t(\mathbf{x}_t) + \boldsymbol{\lambda}^\top \mathbf{G}_t(\mathbf{x}_t)) \\
 &\leq \max_{\mathbf{x}_{1:T} \in \mathcal{X}} \sum_{t \in [T]} (\tilde{F}(\mathbf{x}_t) + \boldsymbol{\lambda}^\top \tilde{\mathbf{G}}(\mathbf{x}_t)) + (\bar{F} + \bar{G}K \frac{\bar{F}}{\beta})\delta \\
 &= T \cdot \max_{\mathbf{x} \in \mathcal{X}} (\tilde{F}(\mathbf{x}) + \boldsymbol{\lambda}^\top \tilde{\mathbf{G}}(\mathbf{x})) + (\bar{F} + \bar{G}K \frac{\bar{F}}{\beta})\delta,
 \end{aligned} \tag{28}$$

583 where the last inequality follows the definitions of  $(\tilde{F}, \tilde{\mathbf{G}})$ , Assumption 2.1, and the general definition  
 584 of  $\delta$ -corruption in Eq. (26). After choosing  $\tilde{\boldsymbol{\lambda}} = \frac{1}{\tau_A} \sum_{t \in [\tau_A]} \boldsymbol{\lambda}_t$ , similar to our proof in Eq. (19) for  
 585 the stochastic case we have

$$\begin{aligned}
 & \text{OPT}(\mathcal{P}_{1:T}) \\
 &= \mathbb{E} \left[ \frac{T - \tau_A}{T} \text{OPT}(\mathcal{P}_{1:T}) + \frac{\tau_A}{T} \text{OPT}(\mathcal{P}_{1:T}) \right] \\
 &\stackrel{(a)}{\leq} \mathbb{E} \left[ (T - \tau_A) \bar{F} + \tau_A \cdot \max_{\mathbf{x} \in \mathcal{X}} (\tilde{F}(\mathbf{x}) + \boldsymbol{\lambda}^\top \tilde{\mathbf{G}}(\mathbf{x})) + \frac{\tau_A}{T} (\bar{F} + \bar{G}K \frac{\bar{F}}{\beta}) \delta \right] \\
 &= \mathbb{E} \left[ (T - \tau_A) \bar{F} + \frac{\tau_A}{T} (\bar{F} + \bar{G}K \frac{\bar{F}}{\beta}) \delta + \max_{\mathbf{x} \in \mathcal{X}} \left( \sum_{t \in [\tau_A]} \tilde{F}(\mathbf{x}) + \boldsymbol{\lambda}_t^\top \tilde{\mathbf{G}}(\mathbf{x}) \right) \right] \\
 &\stackrel{(b)}{\leq} \mathbb{E} \left[ (T - \tau_A) \bar{F} + \left( 1 + \frac{\tau_A}{T} \right) (\bar{F} + \bar{G}K \frac{\bar{F}}{\beta}) \delta + \max_{\mathbf{x} \in \mathcal{X}} \sum_{t \in [\tau_A]} (F_t(\mathbf{x}) + \boldsymbol{\lambda}_t^\top \mathbf{G}_t(\mathbf{x})) \right] \\
 &\leq \mathbb{E} \left[ (T - \tau_A) \bar{F} + \left( 1 + \frac{\tau_A}{T} \right) (\bar{F} + \bar{G}K \frac{\bar{F}}{\beta}) \delta + \max_{\mathbf{x} \in \mathcal{X}} \sum_{t \in [\tau_A]} \mathbb{E} \left[ f_t(\mathbf{x}) + \boldsymbol{\lambda}_t^\top \mathbf{g}_t(\mathbf{x}) \mid \sigma(\mathcal{H}_{t-1}) \right] \right] \\
 &\leq \mathbb{E} \left[ (T - \tau_A) \bar{F} + 2(\bar{F} + \bar{G}K \frac{\bar{F}}{\beta}) \delta + \max_{\mathbf{x} \in \mathcal{X}} \sum_{t \in [\tau_A]} h_t(\mathbf{x}) \right],
 \end{aligned} \tag{29}$$

586 where (a) follows from Eq. (28); (b) follows from the definition of general  $\delta$ -corruption in Eq. (26).  
 587 Finally, we complete the proof by using the definition  $f_t(\mathbf{x}_t) = h_t(\mathbf{x}_t) - \boldsymbol{\lambda}_t^\top \mathbf{g}_t(\mathbf{x}_t)$  and following  
 588 the same argument as in Eq. (21) for the stochastic regime.

### 589 **Periodic.**

590 Recall in Section 2.2 that in the periodic regime, there exists cycle length  $q \in \mathbb{N}$  such that  $T = cq$   
 591 for some integer  $c \geq 2$  with  $\mathcal{P}_{1:T}$  as  $\mathcal{P}_{1:q} = \mathcal{P}_{q+1:2q} = \dots = \mathcal{P}_{(c-1)q+1:T}$ . For any  $t \in [T]$ , define  
 592  $c_t \in [c]$  such that  $(c_t - 1)q + 1 \leq t \leq c_t q$ . After denoting  $\tilde{\mathcal{P}} = \frac{1}{q} \sum_{t \in [q]} \mathcal{P}_t$ , we define the mean  
 593 deviation within a single cycle of length  $q$  as

$$MD(\mathcal{P}_{1:q}) = \sum_{1 \leq t \leq q} \|\mathcal{P}_t - \tilde{\mathcal{P}}\|_{TV} \quad \text{and} \quad \delta = c \cdot MD(\mathcal{P}_{1:q}). \tag{30}$$

594 We define  $\tilde{F}(\mathbf{x}) = \mathbb{E}_{(f,g) \sim \tilde{\mathcal{P}}} [f(\mathbf{x})]$ ,  $\tilde{\mathbf{G}}(\mathbf{x}) = \mathbb{E}_{(f,g) \sim \tilde{\mathcal{P}}} [\mathbf{g}(\mathbf{x})]$ ,  $F_t(\mathbf{x}) = \mathbb{E}_{(f,g) \sim \mathcal{P}_t} [f(\mathbf{x})]$  and  
 595  $\mathbf{G}_t(\mathbf{x}) = \mathbb{E}_{(f,g) \sim \mathcal{P}_t} [\mathbf{g}(\mathbf{x})]$  for all  $t \in [T]$  and any  $\mathbf{x} \in \mathcal{X}$ . Then for any  $\boldsymbol{\lambda} \in [0, \frac{\bar{F}}{\beta} \mathbf{e}]$ , we have

$$\begin{aligned}
 \text{OPT}(\mathcal{P}_{1:T}) &\leq \max_{\mathbf{x}_{1:T} \in \mathcal{X}^T} \sum_{t \in [T]} (F_t(\mathbf{x}_t) + \boldsymbol{\lambda}^\top \mathbf{G}_t(\mathbf{x}_t)) \\
 &= c \cdot \max_{\mathbf{x}_{1:q} \in \mathcal{X}^q} \sum_{t \in [q]} (F_t(\mathbf{x}_t) + \boldsymbol{\lambda}^\top \mathbf{G}_t(\mathbf{x}_t)) \\
 &\leq cq \cdot \max_{\mathbf{x} \in \mathcal{X}} (\tilde{F}(\mathbf{x}) + \boldsymbol{\lambda}^\top \tilde{\mathbf{G}}(\mathbf{x})) + (\bar{F} + \bar{G}K \frac{\bar{F}}{\beta}) c \cdot MD(\mathcal{P}_{1:q}) \\
 &\leq cq \cdot \max_{\mathbf{x} \in \mathcal{X}} (\tilde{F}(\mathbf{x}) + \boldsymbol{\lambda}^\top \tilde{\mathbf{G}}(\mathbf{x})) + (\bar{F} + \bar{G}K \frac{\bar{F}}{\beta}) \delta,
 \end{aligned}$$

596 where the equality follows the nature of periodic setting and the last inequality follows the def-  
 597 initions of  $(\tilde{F}, \tilde{\mathbf{G}})$ , Assumption 2.1, and (30). After choosing  $\boldsymbol{\lambda} = \sum_{\hat{c} \in [c_{\tau_A} - 1]} \frac{q}{\tau_A} \boldsymbol{\lambda}^{(\hat{c}-1)q+1} +$

598  $\frac{\tau_A - (c_{\tau_A} - 1)q}{\tau_A} \boldsymbol{\lambda}_{(c_{\tau_A} - 1)q + 1}$ , we further have that

$$\begin{aligned}
& \text{OPT}(\mathcal{P}_{1:T}) \\
&= \frac{T - \tau_A}{T} \text{OPT}(\mathcal{P}_{1:T}) + \frac{\tau_A}{T} \text{OPT}(\mathcal{P}_{1:T}) \\
&\leq (T - \tau_A) \bar{F} + \tau_A \cdot \max_{\mathbf{x} \in \mathcal{X}} (\tilde{F}(\mathbf{x}) + \boldsymbol{\lambda}^\top \tilde{\mathbf{G}}(\mathbf{x})) + \frac{\tau_A}{T} (\bar{F} + \bar{G}K \frac{\bar{F}}{\beta}) \delta \\
&= (T - \tau_A) \bar{F} + \max_{\mathbf{x} \in \mathcal{X}} \left( \tau_A \tilde{F}(\mathbf{x}) + \left( \sum_{\hat{c} \in [c_{\tau_A} - 1]} q \boldsymbol{\lambda}_{(\hat{c} - 1)q + 1} + (\tau_A - (c_{\tau_A} - 1)q) \boldsymbol{\lambda}_{(c_{\tau_A} - 1)q + 1} \right)^\top \tilde{\mathbf{G}}(\mathbf{x}) \right) \\
&\quad + \frac{\tau_A}{T} (\bar{F} + \bar{G}K \frac{\bar{F}}{\beta}) \delta \\
&= (T - \tau_A) \bar{F} + \max_{\mathbf{x} \in \mathcal{X}} \left( q \cdot \sum_{\hat{c} \in [c_{\tau_A} - 1]} \left( \tilde{F}(\mathbf{x}) + \boldsymbol{\lambda}_{(\hat{c} - 1)q + 1}^\top \tilde{\mathbf{G}}(\mathbf{x}) \right) \right. \\
&\quad \left. + (\tau_A - (c_{\tau_A} - 1)q) \cdot \left( \tilde{F}(\mathbf{x}) + \boldsymbol{\lambda}_{(c_{\tau_A} - 1)q + 1}^\top \tilde{\mathbf{G}}(\mathbf{x}) \right) \right) + \frac{\tau_A}{T} (\bar{F} + \bar{G}K \frac{\bar{F}}{\beta}) \delta \\
&\leq (T - \tau_A) \bar{F} + \max_{\mathbf{x} \in \mathcal{X}} \sum_{t \in [\tau_A]} \left( \tilde{F}(\mathbf{x}) + \boldsymbol{\lambda}_t^\top \tilde{\mathbf{G}}(\mathbf{x}) \right) + \bar{G} \cdot \sum_{t \in [\tau_A]} \|\boldsymbol{\lambda}_t - \boldsymbol{\lambda}_{(c_t - 1)q + 1}\|_1 + \frac{\tau_A}{T} (\bar{F} + \bar{G}K \frac{\bar{F}}{\beta}) \delta.
\end{aligned}$$

599 From (8) in Algorithm 1, we know that  $\|\boldsymbol{\lambda}_{t+1} - \boldsymbol{\lambda}_t\|_1 \leq \eta \bar{G}K$ , which further implies  $\|\boldsymbol{\lambda}_{t+i} - \boldsymbol{\lambda}_t\|_1 \leq$   
600  $\eta \bar{G}K i$  for any  $i \in [q - 1]$  and thus

$$\sum_{t \in [\tau_A]} \|\boldsymbol{\lambda}_t - \boldsymbol{\lambda}_{(c_t - 1)q + 1}\|_1 \leq c_{\tau_A} \eta \bar{G}K \sum_{i \in [q - 1]} i \leq \frac{1}{2} \bar{G}K \eta c_{\tau_A} q^2. \quad (31)$$

601 After combining the two equations above, it follows that

$$\begin{aligned}
& \text{OPT}(\mathcal{P}_{1:T}) \\
&\leq \mathbb{E} \left[ (T - \tau_A) \bar{F} + \max_{\mathbf{x} \in \mathcal{X}} \sum_{t \in [\tau_A]} \left( \tilde{F}(\mathbf{x}) + \boldsymbol{\lambda}_t^\top \tilde{\mathbf{G}}(\mathbf{x}) \right) + \frac{1}{2} \bar{G}^2 K \eta c_{\tau_A} q^2 + \frac{\tau_A}{T} (\bar{F} + \bar{G}K \frac{\bar{F}}{\beta}) \delta \right] \\
&\leq \mathbb{E} \left[ (T - \tau_A) \bar{F} + \max_{\mathbf{x} \in \mathcal{X}} \sum_{t \in [\tau_A]} \left( F_t(\mathbf{x}) + \boldsymbol{\lambda}_t^\top \mathbf{G}_t(\mathbf{x}) \right) + \frac{1}{2} \bar{G}^2 K \eta c_{\tau_A} q^2 + 2(\bar{F} + \bar{G}K \frac{\bar{F}}{\beta}) \delta \right] \\
&\leq \mathbb{E} \left[ (T - \tau_A) \bar{F} + 2(\bar{F} + \bar{G}K \frac{\bar{F}}{\beta}) \delta + \frac{1}{2} \bar{G}^2 K \eta q T + \max_{\mathbf{x} \in \mathcal{X}} \sum_{t \in [\tau_A]} \mathbb{E} \left[ h_t(\mathbf{x}) \mid \sigma(\mathcal{H}_{t-1}) \right] \right] \\
&\leq \mathbb{E} \left[ (T - \tau_A) \bar{F} + 2(\bar{F} + \bar{G}K \frac{\bar{F}}{\beta}) \delta + \frac{1}{2} \bar{G}^2 K \eta q T + \max_{\mathbf{x} \in \mathcal{X}} \sum_{t \in [\tau_A]} h_t(\mathbf{x}) \right]
\end{aligned}$$

602 where the second last inequality follows from  $c_{\tau_A} q \leq cq = T$ .

603 Finally, we complete the proof by using the definition  $f_t(\mathbf{x}_t) = h_t(\mathbf{x}_t) - \boldsymbol{\lambda}_t^\top \mathbf{g}_t(\mathbf{x}_t)$  and following  
604 the same argument as in Eq. (21) for the stochastic regime.

605 **Ergodic.**

606 Consider some  $\kappa \geq \log(T)$ . Given the input distribution sequence  $\mathcal{P}_{1:T}$ , denote  $\mathcal{P}_{(t+\kappa)|[t-1]}$  as the  
607 conditional distribution of  $(f_{t+\kappa}, \mathbf{g}_{t+\kappa})$  conditioned on the  $\{(f_\tau, \mathbf{g}_\tau)\}_{\tau \in [t]}$ . Then, in the ergodic  
608 regime, there exists a stationary distribution  $\tilde{\mathcal{P}} \in \Delta(\mathcal{S})$  and absolute constant  $R > 0$  such that

$$\sup_{\{(f_t, \mathbf{g}_t)\}_{t \in [T]} \in \mathcal{S}^T} \sup_{t \in [T - \kappa]} \|\mathcal{P}_{(t+\kappa)|[t-1]} - \tilde{\mathcal{P}}\|_{TV} \leq \delta := R \exp(-\kappa) \quad (32)$$

609 By defining  $\tilde{F}(\mathbf{x}) = \mathbb{E}_{(f, \mathbf{g}) \sim \tilde{\mathcal{P}}}[f(\mathbf{x})]$ ,  $\tilde{\mathbf{G}}(\mathbf{x}) = \mathbb{E}_{(f, \mathbf{g}) \sim \tilde{\mathcal{P}}}[\mathbf{g}(\mathbf{x})]$ ,  $\hat{F}_{t+\kappa}(\mathbf{x}) =$   
610  $\mathbb{E}_{(f, \mathbf{g}) \sim \mathcal{P}_{(t+\kappa)|[t-1]}}[f(\mathbf{x})]$ ,  $\hat{\mathbf{G}}_{t+\kappa}(\mathbf{x}) = \mathbb{E}_{(f, \mathbf{g}) \sim \mathcal{P}_{(t+\kappa)|[t-1]}}[\mathbf{g}(\mathbf{x})]$ ,  $F_t(\mathbf{x}) = \mathbb{E}_{(f, \mathbf{g}) \sim \mathcal{P}_t}[f(\mathbf{x})]$

611 and  $\mathbf{G}_t(\mathbf{x}) = \mathbb{E}_{(f,g) \sim \mathcal{P}_t}[\mathbf{g}(\mathbf{x})]$  for all  $t \in [T]$  and any  $\mathbf{x} \in \mathcal{X}$ , we know that for any  $\boldsymbol{\lambda} \in [0, \frac{\bar{F}}{\beta} \mathbf{e}]$ , it  
 612 follows that

$$\begin{aligned}
& \text{OPT}(\mathcal{P}_{1:T}) \\
& \leq \max_{\mathbf{x}_{1:T} \in \mathcal{X}^T} \mathbb{E} \left[ \sum_{t \in [T]} (F_t(\mathbf{x}_t) + \boldsymbol{\lambda}^\top \mathbf{G}_t(\mathbf{x}_t)) \right] \\
& = \max_{\mathbf{x}_{1:\kappa} \in \mathcal{X}^\kappa} \mathbb{E} \left[ \sum_{t \in [\kappa]} (F_t(\mathbf{x}_t) + \boldsymbol{\lambda}^\top \mathbf{G}_t(\mathbf{x}_t)) \right] + \max_{\mathbf{x}_{\kappa+1:T} \in \mathcal{X}^{T-\kappa}} \mathbb{E} \left[ \sum_{t=1}^{T-\kappa} (\hat{F}_{t+\kappa}(\mathbf{x}_{t+\kappa}) + \boldsymbol{\lambda}^\top \hat{\mathbf{G}}_{t+\kappa}(\mathbf{x}_{t+\kappa})) \right] \\
& \leq (\bar{F} + \bar{G}K \frac{\bar{F}}{\beta})\kappa + \max_{\mathbf{x}_{\kappa+1:T} \in \mathcal{X}^{T-\kappa}} \sum_{t=1}^{T-\kappa} (\tilde{F}(\mathbf{x}_{t+\kappa}) + \boldsymbol{\lambda}^\top \tilde{\mathbf{G}}(\mathbf{x}_{t+\kappa})) + (\bar{F} + \bar{G}K \frac{\bar{F}}{\beta}) \cdot (T - \kappa)\delta \\
& \leq T \cdot \max_{\mathbf{x} \in \mathcal{X}} (\tilde{F}(\mathbf{x}) + \boldsymbol{\lambda}^\top \tilde{\mathbf{G}}(\mathbf{x})) + (\bar{F} + \bar{G}K \frac{\bar{F}}{\beta})\kappa + (\bar{F} + \bar{G}K \frac{\bar{F}}{\beta}) \cdot T\delta
\end{aligned} \tag{33}$$

613 By choosing  $\boldsymbol{\lambda} = \frac{1}{\tau_A} \sum_{t \in [\tau_A]} \boldsymbol{\lambda}_t$ , we further have

$$\begin{aligned}
& \text{OPT}(\mathcal{P}_{1:T}) \\
& = \mathbb{E} \left[ \frac{T - \tau_A}{T} \text{OPT}(\mathcal{P}_{1:T}) + \frac{\tau_A}{T} \text{OPT}(\mathcal{P}_{1:T}) \right] \\
& \leq \mathbb{E} \left[ (T - \tau_A)\bar{F} + \tau_A \cdot \max_{\mathbf{x} \in \mathcal{X}} (\tilde{F}(\mathbf{x}) + \boldsymbol{\lambda}^\top \tilde{\mathbf{G}}(\mathbf{x})) \right] + (\bar{F} + \bar{G}K \frac{\bar{F}}{\beta})\kappa + (\bar{F} + \bar{G}K \frac{\bar{F}}{\beta}) \cdot T\delta \\
& = \mathbb{E} \left[ (T - \tau_A)\bar{F} + \max_{\mathbf{x} \in \mathcal{X}} \sum_{t \in [\tau_A]} (\tilde{F}(\mathbf{x}) + \boldsymbol{\lambda}_t^\top \tilde{\mathbf{G}}(\mathbf{x})) \right] + (\bar{F} + \bar{G}K \frac{\bar{F}}{\beta})\kappa + (\bar{F} + \bar{G}K \frac{\bar{F}}{\beta}) \cdot T\delta \\
& \leq \mathbb{E} \left[ (T - \tau_A)\bar{F} + \max_{\mathbf{x} \in \mathcal{X}} \sum_{t \in [\tau_A]} (\hat{F}_{t+\kappa}(\mathbf{x}) + \boldsymbol{\lambda}_t^\top \hat{\mathbf{G}}_{t+\kappa}(\mathbf{x})) \right] + (\bar{F} + \bar{G}K \frac{\bar{F}}{\beta})\kappa + 2(\bar{F} + \bar{G}K \frac{\bar{F}}{\beta}) \cdot T\delta \\
& = \mathbb{E} \left[ (T - \tau_A)\bar{F} + \max_{\mathbf{x} \in \mathcal{X}} \sum_{t \in [\tau_A]} (\hat{F}_{t+\kappa}(\mathbf{x}) + \boldsymbol{\lambda}_{t+\kappa}^\top \hat{\mathbf{G}}_{t+\kappa}(\mathbf{x}) + (\boldsymbol{\lambda}_t - \boldsymbol{\lambda}_{t+\kappa})^\top \hat{\mathbf{G}}_{t+\kappa}(\mathbf{x})) \right] \\
& \quad + (\bar{F} + \bar{G}K \frac{\bar{F}}{\beta})\kappa + 2(\bar{F} + \bar{G}K \frac{\bar{F}}{\beta}) \cdot T\delta \\
& \stackrel{(a)}{\leq} \mathbb{E} \left[ (T - \tau_A)\bar{F} + \max_{\mathbf{x} \in \mathcal{X}} \sum_{t \in [\tau_A]} (\hat{F}_{t+\kappa}(\mathbf{x}) + \boldsymbol{\lambda}_{t+\kappa}^\top \hat{\mathbf{G}}_{t+\kappa}(\mathbf{x})) \right] + \kappa\eta TK\bar{G}^2 \\
& \quad + (\bar{F} + \bar{G}K \frac{\bar{F}}{\beta})\kappa + 2(\bar{F} + \bar{G}K \frac{\bar{F}}{\beta}) \cdot T\delta \\
& \leq \mathbb{E} \left[ (T - \tau_A)\bar{F} + \max_{\mathbf{x} \in \mathcal{X}} \sum_{t \in [\tau_A - \kappa]} (\hat{F}_{t+\kappa}(\mathbf{x}) + \boldsymbol{\lambda}_{t+\kappa}^\top \hat{\mathbf{G}}_{t+\kappa}(\mathbf{x})) \right] + \kappa\eta TK\bar{G}^2 \\
& \quad + 2(\bar{F} + \bar{G}K \frac{\bar{F}}{\beta})\kappa + 2(\bar{F} + \bar{G}K \frac{\bar{F}}{\beta}) \cdot T\delta \\
& \stackrel{(b)}{\leq} \mathbb{E} \left[ (T - \tau_A)\bar{F} + \max_{\mathbf{x} \in \mathcal{X}} \sum_{t=\kappa+1}^{\tau_A} h_t(\mathbf{x}) \right] + \kappa\eta TK\bar{G}^2 + 2(\bar{F} + \bar{G}K \frac{\bar{F}}{\beta})\kappa + 2(\bar{F} + \bar{G}K \frac{\bar{F}}{\beta}) \cdot T\delta \\
& \leq \mathbb{E} \left[ (T - \tau_A)\bar{F} + \max_{\mathbf{x} \in \mathcal{X}} \sum_{t \in [\tau_A]} h_t(\mathbf{x}) \right] + \kappa\eta TK\bar{G}^2 + 2(\bar{F} + \bar{G}K \frac{\bar{F}}{\beta})\kappa + 2(\bar{F} + \bar{G}K \frac{\bar{F}}{\beta}) \cdot T\delta \\
& \stackrel{(c)}{\leq} \mathbb{E} \left[ (T - \tau_A)\bar{F} + \max_{\mathbf{x} \in \mathcal{X}} \sum_{t \in [\tau_A]} h_t(\mathbf{x}) \right] + \kappa\eta TK\bar{G}^2 + 2(\bar{F} + \bar{G}K \frac{\bar{F}}{\beta})\kappa + 2R(\bar{F} + \bar{G}K \frac{\bar{F}}{\beta}),
\end{aligned} \tag{34}$$



614 where in (a), from (8) in Algorithm 1, we know that  $\|\boldsymbol{\lambda}_{t+1} - \boldsymbol{\lambda}_t\|_1 \leq \eta \bar{G} K$ , which further implies  
 615  $\|\boldsymbol{\lambda}_{t+\kappa} - \boldsymbol{\lambda}_t\|_1 \leq \kappa \eta \bar{G} K$  and thus

$$(\boldsymbol{\lambda}_t - \boldsymbol{\lambda}_{t+\kappa})^\top \hat{\mathbf{G}}_{t+\kappa}(\mathbf{x}_t) \leq \kappa \eta K \bar{G}^2 \quad (35)$$

616 In (b), we used the fact that for any  $t \geq \kappa + 1$ , we have

$$\begin{aligned} & \mathbb{E} \left[ \max_{\mathbf{x} \in \mathcal{X}} \sum_{t \in [\tau_A - \kappa]} (\hat{F}_{t+\kappa}(\mathbf{x}) + \boldsymbol{\lambda}_{t+\kappa}^\top \hat{\mathbf{G}}_{t+\kappa}(\mathbf{x}_t)) \right] \\ &= \mathbb{E} \left[ \max_{\mathbf{x} \in \mathcal{X}} \sum_{t \in [\tau_A - \kappa]} \mathbb{E} \left[ h_{t+\kappa}(\mathbf{x}) \mid (f_\tau, \mathbf{g}_\tau)_{\tau \in [t-1]} \right] \right] \\ &\leq \mathbb{E} \left[ \max_{\mathbf{x} \in \mathcal{X}} \sum_{t \in [\tau_A - \kappa]} h_{t+\kappa}(\mathbf{x}) \right] \end{aligned} \quad (36)$$

617 In (c) we used the fact that  $\kappa \geq \log(T)$ , so  $\delta = R \exp(-\kappa) \geq R$ .

618 Finally, we complete the proof by using the definition  $f_t(\mathbf{x}_t) = h_t(\mathbf{x}_t) - \boldsymbol{\lambda}_t^\top \mathbf{g}_t(\mathbf{x}_t)$  and following  
 619 the same argument as in Eq. (21) for the stochastic regime.

## 620 A.8 Proof of Theorem 4.2

621 *Proof.* We bound the regret in every world as followed

$$\begin{aligned} \mathcal{R}_T &= \text{OPT}(\mathcal{P}_{1:T}) - \sum_{t \in [T]} \mathbb{E} [f_t(\mathbf{x}_t)] \\ &\stackrel{(a)}{\leq} \mathbb{E} \left[ \bar{F}(T - \tau_A) + \sum_{t \in [\tau_A]} \boldsymbol{\lambda}_t^\top \mathbf{g}_t(\mathbf{x}_t) + \mathcal{R}_{\text{BOCO}}(\tau_A) \right] \\ &\stackrel{(b)}{\leq} \mathbb{E} \left[ \mathcal{R}_{\text{BOCO}}(\tau_A) \right] \end{aligned}$$

622 where (a) follows from Lemma 4.3, and (b) follows from Lemma 4.5. Recall  $\mathcal{R}_{\text{BOCO}}(\tau_A)$  is specified  
 623 in Lemma 4.3 for each world.

624 In the following we bound  $\mathcal{R}_{\text{BOCO}}(\tau_A)$  for each world.

### 625 Stochastic.

$$\mathbb{E} \left[ \mathcal{R}_{\text{BOCO}}(\tau_A) \right] = \mathbb{E} \left[ \max_{\mathbf{x} \in \mathcal{X}} \sum_{t \in [\tau_A]} h_t(\mathbf{x}) - h_t(\mathbf{x}_t) \right] \stackrel{(a)}{\leq} \mathcal{O} \left( \frac{\rho T}{\beta} + \frac{1}{\gamma_i} + \frac{\gamma_i K T}{\beta^2 \rho^2} + T\epsilon + \frac{1}{\epsilon} \right) \stackrel{(b)}{=} \mathcal{O} \left( T^{\frac{3}{4}} \right) \quad (37)$$

626 where (a) follows from Lemma 4.6 by taking the comparator sequence  $\mathbf{y}_t =$   
 627  $\arg \max_{\mathbf{x} \in \mathcal{X}} \sum_{t \in [\tau_A]} h_t(\mathbf{x})$  for all  $t \in [\tau_A]$  such that  $P(\mathbf{y}_{1:T}) = 1$ , as well as any primal  
 628 ascent expert  $i \in [N]$ ; (b) follows from taking  $\eta = \frac{1}{\sqrt{KT}}$ ,  $\rho = K^{\frac{1}{3}} T^{-\frac{1}{4}}$ ,  $\epsilon = T^{-\frac{1}{2}}$ ,  $\beta = \frac{1}{\log(T)}$ ,  
 629 and finally choosing  $\gamma_i = K^{-\frac{1}{6}} (1 + DT)^{\frac{1}{2}} T^{-\frac{3}{4}}$ . Recall all primal ascent expert stepsizes are  
 630  $\{\gamma_1 \dots \gamma_N\} = \{2^{-i} K^{-\frac{1}{6}} (1 + DT)^{\frac{1}{2}} T^{-\frac{3}{4}} : i = 0 \dots N\}$ .

631  **$\delta$ -corrupted, Periodic, and Ergodic.** The proof is nearly identical with that of the stochastic world  
 632 in Eq. (37) given that we still consider the comparator sequence  $\mathbf{y}_t = \arg \max_{\mathbf{x} \in \mathcal{X}} \sum_{t \in [\tau_A]} h_t(\mathbf{x})$   
 633 for all  $t \in [\tau_A]$  such that  $P(\mathbf{y}_{1:T}) = 1$ . Hence we will omit the proof.

634 **Adversarial.** Recall the definition  $\tilde{\mathbf{y}}_t = \arg \max_{\mathbf{x} \in \mathcal{X}} f_t(\mathbf{x}_t) + \boldsymbol{\lambda}_t^\top \mathbf{g}(\mathbf{x}_t)$ . Then we have

$$\begin{aligned} \mathbb{E} \left[ \mathcal{R}_{\text{BOCO}}(\tau_A) \right] &= \left( 1 - \frac{1}{\xi} \right) \text{OPT}(\mathcal{P}_{1:T}) + \sum_{t \in [\tau_A]} \mathbb{E} \left[ h_t(\tilde{\mathbf{y}}_t) - h_t(\mathbf{x}_t) \right] \\ &\leq \mathcal{O} \left( \frac{\rho T}{\beta} + \frac{1 + P(\tilde{\mathbf{y}}_{1:T})}{\gamma_i} + \frac{\gamma_i K T}{\beta^2 \rho^2} + T\epsilon + \frac{1}{\epsilon} \right) = \left( 1 - \frac{1}{\xi} \right) \text{OPT}(\mathcal{P}_{1:T}) + o(T) \end{aligned} \quad (38)$$

635 where we chose the primal ascent stepsize  $\gamma_i$  s.t.

$$\frac{1}{2}K^{-\frac{1}{6}}(1 + P(\tilde{\mathbf{y}}_{1:T}))^{\frac{1}{2}}T^{-\frac{3}{4}} \leq \gamma_i \leq K^{-\frac{1}{6}}(1 + P(\tilde{\mathbf{y}}_{1:T}))^{\frac{1}{2}}T^{-\frac{3}{4}} \quad (39)$$

636 We note that such a  $\gamma_i$  must exist because  $P(\tilde{\mathbf{y}}_{1:T}) \leq DT$  given all  $\tilde{\mathbf{y}}_t \in \mathcal{X}$ , so that the largest  
637 element in the primal ascent stepsize set, namely  $K^{-\frac{1}{6}}(1 + DT)^{\frac{1}{2}}T^{-\frac{3}{4}}$  is larger than the upper bound  
638 above, namely  $K^{-\frac{1}{6}}(1 + P(\tilde{\mathbf{y}}_{1:T}))^{\frac{1}{2}}T^{-\frac{3}{4}}$ .

639 □

## 640 A.9 Proof for Lemma A.1

641 *Proof.* Recall the definition  $h_t(\mathbf{x}) = f_t(\mathbf{x}) + \boldsymbol{\lambda}_t^\top \mathbf{g}_t(\mathbf{x})$  in Eq. (4). Then we have

$$\begin{aligned} \left| h_t(\mathbf{x}) - h_t(\mathbf{x}') \right| &\leq \left| f_t(\mathbf{x}) - f_t(\mathbf{x}') \right| + \|\boldsymbol{\lambda}_t\| \cdot \|\mathbf{g}_t(\mathbf{x}) - \mathbf{g}_t(\mathbf{x}')\| \\ &\stackrel{(a)}{\leq} L\|\mathbf{x} - \mathbf{x}'\| + K\frac{\bar{F}}{\beta}L\|\mathbf{x} - \mathbf{x}'\| = (1 + K\frac{\bar{F}}{\beta})L \cdot \|\mathbf{x} - \mathbf{x}'\| \end{aligned} \quad (40)$$

642 where (a) follows from the fact that any  $(f, \mathbf{g}) \in \mathcal{S}$  are  $L$ -lipschitz under Assumption 2.1.

643 On the other hand, recall the definition  $\hat{h}_t(\mathbf{x}) = \mathbb{E}_{\mathbf{v} \sim U(\mathbb{B})}[\mathcal{L}_t(\mathbf{x} + \rho\mathbf{v}, \boldsymbol{\lambda}_t)]$  in Eq. (10). Then we have

$$\left| h_t(\mathbf{x}) - \hat{h}_t(\mathbf{x}) \right| = \left| \mathbb{E}_{\mathbf{v} \sim U(\mathbb{B})} [h_t(\mathbf{x}) - h_t(\mathbf{x} + \rho\mathbf{v})] \right| \leq (1 + K\frac{\bar{F}}{\beta})L\rho \cdot \mathbb{E}_{\mathbf{v} \sim U(\mathbb{B})} [\|\mathbf{v}\|] = (1 + K\frac{\bar{F}}{\beta})L\rho \quad (41)$$

644 where the inequality follows from the first part of this lemma. □

## 645 A.10 Proof of Lemma A.2

646 *Proof.* Recall the definitions  $h_t(\mathbf{x}) = f_t(\mathbf{x}) + \boldsymbol{\lambda}_t^\top \mathbf{g}_t(\mathbf{x})$  in Eq. (4), and  $\hat{h}_t(\mathbf{x}) = \mathbb{E}_{\mathbf{v} \sim U(\mathbb{B})}[\mathcal{L}_t(\mathbf{x} +$   
647  $\rho\mathbf{v}, \boldsymbol{\lambda}_t)]$  in Eq. (10). Then, we have

$$\begin{aligned} \hat{h}_t(\mathbf{y}) - \hat{h}_t(\tilde{\mathbf{x}}_t) &\stackrel{(a)}{\leq} \langle \nabla \hat{h}_t(\tilde{\mathbf{x}}_t), \mathbf{y} - \tilde{\mathbf{x}}_t \rangle \\ &\stackrel{(b)}{=} \left\langle \frac{d}{\rho} \cdot \mathbb{E}_{\mathbf{u} \sim U(\mathbb{S})} [h_t(\tilde{\mathbf{x}}_t + \rho\mathbf{u}) \cdot \mathbf{u}], \mathbf{y} - \tilde{\mathbf{x}}_t \right\rangle \\ &= \mathbb{E}_{\mathbf{u}_t \sim U(\mathbb{S})} \left[ \left\langle \frac{d}{\rho} \cdot h_t(\tilde{\mathbf{x}}_t + \rho\mathbf{u}_t) \cdot \mathbf{u}_t, \mathbf{y} - \tilde{\mathbf{x}}_t \right\rangle \right] \\ &\stackrel{(c)}{=} \mathbb{E}_{\mathbf{u}_t \sim U(\mathbb{S})} [\langle \nabla_t, \mathbf{y} - \tilde{\mathbf{x}}_t \rangle] \\ &\stackrel{(d)}{=} \mathbb{E}_{\mathbf{u}_t \sim U(\mathbb{S})} [\ell_t(\tilde{\mathbf{x}}_t) - \ell_t(\mathbf{y})] \end{aligned} \quad (42)$$

648 where (a) follows from concavity of  $\hat{h}_t(\cdot)$ ; (b) follows from Lemma B.2 by taking  $h = -h_t$ ,  
649 so that in the lemma  $-\nabla_{\mathbf{x}} \mathbb{E}_{\mathbf{v} \sim U(\mathbb{B})} [h(\mathbf{x} + \rho\mathbf{v})] = \nabla \hat{h}_t(\mathbf{x})$  and  $-\mathbb{E}_{\mathbf{u} \sim U(\mathbb{S})} [h(\mathbf{x} + \rho\mathbf{u}) \cdot \mathbf{u}] =$   
650  $\mathbb{E}_{\mathbf{u} \sim U(\mathbb{S})} [h_t(\mathbf{x} + \rho\mathbf{u}) \cdot \mathbf{u}]$ ; (c) follows from the gradient estimate in Eq. (6) where

$$\nabla_t = \frac{d}{\rho} (f_t(\mathbf{x}_t) + \boldsymbol{\lambda}_t^\top \mathbf{g}_t(\mathbf{x}_t)) \cdot \mathbf{u}_t = \frac{d}{\rho} \cdot h_t(\mathbf{x}_t) \cdot \mathbf{u}_t = \frac{d}{\rho} \cdot h_t(\tilde{\mathbf{x}}_t + \rho\mathbf{u}_t) \cdot \mathbf{u}_t$$

651 Finally, (d) follows from the definition of surrogate loss functions in Eq. (7). □

## 652 A.11 Proof of Lemma A.3

653 **Proving (i):**

654 *Proof.* Since  $\tilde{\mathbf{x}}_{t+1}^i = \Pi_{(1-\alpha)\mathcal{X}}(\tilde{\mathbf{x}}_t^i + \gamma_i \nabla_t)$  we have  $\|\mathbf{y} - \tilde{\mathbf{x}}_{t+1}^i\| \leq \|\mathbf{y} - (\tilde{\mathbf{x}}_t^i + \gamma_i \nabla_t)\|$  for any  
655  $\mathbf{y} \in (1 - \alpha)\mathcal{X}$ . Then

$$\begin{aligned} \|\mathbf{y} - \tilde{\mathbf{x}}_{t+1}^i\|^2 &\leq \|\mathbf{y} - \tilde{\mathbf{x}}_t^i\|^2 - 2\gamma_i \nabla_t^\top (\mathbf{y} - \tilde{\mathbf{x}}_t^i) + \gamma_i^2 \nabla_t^2 \\ \implies \|\tilde{\mathbf{x}}_{t+1}^i\|^2 &\leq \|\tilde{\mathbf{x}}_t^i\|^2 + 2\mathbf{y}^\top (\tilde{\mathbf{x}}_{t+1}^i - \tilde{\mathbf{x}}_t^i) - 2\gamma_i \nabla_t^\top (\mathbf{y} - \tilde{\mathbf{x}}_t^i) + \gamma_i^2 \nabla_t^2 \end{aligned}$$

656 Hence by taking  $\mathbf{y} = (1 - \alpha)\mathbf{y}_t \in (1 - \alpha)\mathcal{X}$  and rearranging we get

$$\begin{aligned}
& 2\gamma_i (\ell_t(\tilde{\mathbf{x}}_t^i) - \ell_t((1 - \alpha)\mathbf{y}_t)) \\
&= 2\gamma_i \nabla_t^\top ((1 - \alpha)\mathbf{y}_t - \tilde{\mathbf{x}}_t^i) \\
&\leq \|\tilde{\mathbf{x}}_t^i\|^2 - \|\tilde{\mathbf{x}}_{t+1}^i\|^2 + 2(1 - \alpha)\mathbf{y}_t^\top (\tilde{\mathbf{x}}_{t+1}^i - \tilde{\mathbf{x}}_t^i) + \gamma_i^2 \nabla_t^2
\end{aligned} \tag{43}$$

657 Telescoping with  $\tau = 1 \dots t$  we get

$$\begin{aligned}
& \sum_{\tau \in [t]} \ell_\tau(\tilde{\mathbf{x}}_\tau^i) - \sum_{\tau \in [t]} \ell_\tau((1 - \alpha)\mathbf{y}_\tau) \\
&= \frac{1}{2\gamma_i} \|\tilde{\mathbf{x}}_1^i\|^2 + \frac{1 - \alpha}{\gamma_i} \sum_{t \in [T]} \mathbf{y}_t^\top (\tilde{\mathbf{x}}_{t+1}^i - \tilde{\mathbf{x}}_t^i) + \frac{\gamma_i}{2} \sum_{\tau \in [t]} \nabla_\tau^2 \\
&= \frac{1}{2\gamma_i} \|\tilde{\mathbf{x}}_1^i\|^2 + \frac{1 - \alpha}{\gamma_i} \left( \sum_{\tau \in [t-1]} (\mathbf{y}_\tau - \mathbf{y}_{\tau+1})^\top \tilde{\mathbf{x}}_{\tau+1}^i + \mathbf{y}_t^\top \tilde{\mathbf{x}}_{t+1}^i \right) + \frac{\gamma_i}{2} \sum_{\tau \in [t]} \nabla_\tau^2 \\
&\leq \frac{1}{2\gamma_i} \|\tilde{\mathbf{x}}_1^i\|^2 + \frac{1 - \alpha}{\gamma_i} \sum_{\tau \in [t-1]} (\|\mathbf{y}_\tau - \mathbf{y}_{\tau+1}\| \cdot \|\tilde{\mathbf{x}}_{\tau+1}^i\| + \|\mathbf{y}_\tau\| \cdot \|\tilde{\mathbf{x}}_{\tau+1}^i\|) + \frac{\gamma_i}{2} \sum_{\tau \in [t]} \nabla_\tau^2 \\
&\leq \frac{(1 - \alpha)^2 D^2}{2\gamma_i} + \frac{(1 - \alpha)^2 D}{\gamma_i} (P(\mathbf{y}_{1:T}) + D) + \frac{\gamma_i d^2}{2\rho^2} \left( \bar{F} + K \frac{\bar{F}}{\beta} \bar{G} \right)^2 t
\end{aligned} \tag{44}$$

658

□

659 **Proving (ii):**

660 *Proof.* First, we have for any  $t \in [T], i \in [N]$

$$|\ell_t(\tilde{\mathbf{x}}_t^i)| = |\nabla_t^\top (\tilde{\mathbf{x}}_t - \tilde{\mathbf{x}}_t^i)| \leq \|\nabla_t\| \cdot \|\tilde{\mathbf{x}}_t^i - \tilde{\mathbf{x}}_t\| \leq \frac{d}{\rho} \left( \bar{F} + K \frac{\bar{F}}{\beta} \bar{G} \right) \cdot (1 - \alpha) D \tag{45}$$

661 where we recall  $D = \sup_{\mathbf{x}, \mathbf{x}' \in \mathcal{X}} \|\mathbf{x} - \mathbf{x}'\|$  is the diameter of  $\mathcal{X}$ , and both  $\tilde{\mathbf{x}}_t^i, \tilde{\mathbf{x}}_t \in (1 - \alpha)\mathcal{X}$ .

662 Define  $W_t = \sum_{i \in [N]} w_{i,t}$  for all  $t \in [T]$ , then

$$\begin{aligned}
\log \left( \frac{W_{t+1}}{W_t} \right) &= \log \left( \sum_{i \in [N]} \frac{w_{i,t} \exp(-\epsilon \ell_t(\tilde{\mathbf{x}}_t^i))}{W_t} \right) \\
&= \log \left( \mathbb{E}_{I_t \sim w_t / W_t} \left[ \exp(-\epsilon \ell_t(\tilde{\mathbf{x}}_t^{I_t})) \right] \right) \\
&\stackrel{(a)}{\leq} -\epsilon \mathbb{E}_{I_t \sim w_t / W_t} \left[ \ell_t(\tilde{\mathbf{x}}_t^{I_t}) \right] + \frac{\epsilon^2}{8} \\
&\stackrel{(b)}{=} -\epsilon \ell_t \left( \mathbb{E}_{I_t \sim w_t / W_t} \left[ \tilde{\mathbf{x}}_t^{I_t} \right] \right) + \frac{\epsilon^2}{8} \\
&\stackrel{(c)}{=} -\epsilon \ell_t(\tilde{\mathbf{x}}_t) + \frac{\epsilon^2}{8}
\end{aligned} \tag{46}$$

663 Here (a) follows from Hoeffding's Lemma as described in Lemma B.1 where we take  $X = \ell_t(\tilde{\mathbf{x}}_t^{I_t})$ ,  
664  $a =$  and  $b =$ ; (b) follows from the definition that  $\ell_t(\tilde{\mathbf{x}}) = \nabla_t^\top (\tilde{\mathbf{x}} - \tilde{\mathbf{x}}_t)$  is a linear function in  $\tilde{\mathbf{x}}$ ; (c)  
665 follows from Eq.(5).

666 Hence, telescoping the above we get

$$\log \left( \frac{W_{t+1}}{W_1} \right) \leq -\epsilon \sum_{\tau \in [t]} \ell_\tau(\tilde{\mathbf{x}}_\tau) + \frac{t\epsilon^2}{8} \tag{47}$$

667 On the other hand, we have

$$\begin{aligned}
\log\left(\frac{W_{t+1}}{W_1}\right) &= \log(W_{t+1}) - \log(W_1) \\
&\geq \log(\max_{i \in [N]} w_{i,t}) - \log(N) \\
&= \max_{i \in [N]} \log(w_{i,t}) - \log(N) \\
&\stackrel{(a)}{=} \max_{i \in [N]} \log\left(w_{i,1} \exp\left(-\epsilon \sum_{\tau \in [t]} \ell_\tau(\tilde{\mathbf{x}}_\tau^i)\right)\right) - \log(N) \\
&= -\epsilon \min_{i \in [N]} \sum_{\tau \in [t]} \ell_\tau(\tilde{\mathbf{x}}_\tau^i) - \log(N)
\end{aligned} \tag{48}$$

668 Hence, combining Eqs.(47) and (48), and dividing both sides by  $\epsilon > 0$  we get

$$\begin{aligned}
-\sum_{\tau \in [t]} \ell_\tau(\tilde{\mathbf{x}}_\tau) + \frac{t\epsilon}{8} &\geq -\min_{i \in [N]} \sum_{\tau \in [t]} \ell_\tau(\tilde{\mathbf{x}}_\tau^i) - \frac{\log(N)}{\epsilon} \\
\implies \sum_{\tau \in [t]} \ell_\tau(\tilde{\mathbf{x}}_\tau) - \min_{i \in [N]} \sum_{\tau \in [t]} \ell_\tau(\tilde{\mathbf{x}}_\tau^i) &\leq \frac{t\epsilon}{8} + \frac{\log(N)}{\epsilon} \\
\implies \sum_{\tau \in [t]} \ell_\tau(\tilde{\mathbf{x}}_\tau) - \sum_{\tau \in [t]} \ell_\tau(\tilde{\mathbf{x}}_\tau^i) &\leq \frac{t\epsilon}{8} + \frac{\log(N)}{\epsilon}, \quad \forall i \in [N]
\end{aligned} \tag{49}$$

669

□

## 670 B Supplementary lemmas

671 **Lemma B.1** (Hoeffding's lemma). *Let  $X$  be some random variable such that  $a \leq X \leq b$  almost*  
672 *surely for some  $a, b \in \mathbb{R}$ . Then for any  $\epsilon \in \mathbb{R}$ , we have  $\mathbb{E}[\exp(-\epsilon X)] \leq \exp\left(-\epsilon \mathbb{E}[X] + \frac{\epsilon^2(b-a)^2}{8}\right)$ .*

673 **Lemma B.2** ([25] Lemma 2.1). *Let  $h : \mathcal{X} \rightarrow \mathbb{R}$  be some convex function (not necessarily differen-*  
674 *tiable). Then for any  $\mathbf{x} \in \mathcal{X} \subseteq \mathbb{R}^d$  and  $\delta > 0$  we have*

$$\nabla_{\mathbf{x}} \mathbb{E}_{\mathbf{v} \sim U(\mathbb{B})} [h(\mathbf{x} + \delta \mathbf{v})] = \frac{d}{\delta} \cdot \mathbb{E}_{\mathbf{u} \sim U(\mathbb{S})} [h(\mathbf{x} + \delta \mathbf{u}) \cdot \mathbf{u}] \tag{50}$$
